# Supplementary material for: Potential Active Ingredients of Traditional Chinese Medicine NaoMaiTong for Ischemia Stroke Treatment
Source: Preprints.org preprint supplement (doi:10.20944/preprints201805.0323.v1), 2018-05-24
Supplement: Supplementary file 1 [file supplementary]

Archive with 2 entries (2 files):
- 7896-suppl-1.pdf
- 7896-suppl-2.pdf
