# Supplementary material for: Potential Active Ingredients of Traditional Chinese Medicine NaoMaiTong for Ischemia Stroke Treatment
Source: Preprints.org preprint supplement (doi:10.20944/preprints201805.0323.v1), 2018-05-24
Supplement: Supplementary file 1 [file supplementary › 7896-suppl-1.pdf]

Table 1

Effects of cell viability of Na<sub>2</sub>S<sub>2</sub>O<sub>4</sub> solution injury on PC12 cell preprotected 2 h by 5% NMT and its four single herbs drug-containing

| Dosing<br>time<br>point<br>(h) | Cell vitality of NMT |          | Cell vitality of rhubarb |          | Cell vitality of Ginseng |          | Cell vitality of Pueraria |          | Cell vitality of Chuanxiong |          |
|--------------------------------|----------------------|----------|--------------------------|----------|--------------------------|----------|---------------------------|----------|-----------------------------|----------|
|                                | OD <sub>490nm</sub>  | Cell     | OD <sub>490nm</sub>      | Cell     | OD <sub>490nm</sub>      | Cell     | OD <sub>490nm</sub>       | Cell     | OD <sub>490nm</sub>         | Cell     |
|                                |                      | survival |                          | survival |                          | survival |                           | survival |                             | survival |
|                                |                      | rate     |                          | rate     |                          | rate     |                           | rate     |                             | rate     |
|                                |                      | (%)      |                          | (%)      |                          | (%)      |                           | (%)      |                             | (%)      |
| 0                              | 0.2425 ± 0.0116      | 45.44    | 0.3313 ± 0.0075          | 52.22    | 0.3015 ± 0.0288          | 52.97    | 0.2868 ± 0.0150           | 51.73    | 0.3670 ± 0.0175             | 49.45    |
| 0.08                           | 0.2460 ± 0.0229      | 46.40    | 0.3597 ± 0.0190          | 58.51    | 0.2870 ± 0.0563          | 49.38    | 0.2870 ± 0.0563           | 51.79    | 0.3657 ± 0.0777             | 49.21    |
| 0.25                           | 0.2805 ± 0.0400      | 47.86    | 0.3097 ± 0.0222          | 58.60    | 0.2728 ± 0.0674          | 52.85    | 0.2728 ± 0.0674           | 48.14    | 0.3830 ± 0.0278             | 52.38    |
| 0.5                            | 0.2560 ± 0.0278      | 49.14    | 0.3603 ± 0.0401          | 58.65    | 0.3150 ± 0.0133          | 56.32    | 0.3150 ± 0.0133           | 58.97    | 0.3657 ± 0.0227             | 59.21    |
| 0.75                           | 0.2598 ± 0.0346      | 50.17    | 0.3603 ± 0.0331          | 58.65    | 0.3198 ± 0.0466          | 57.50    | 0.3198 ± 0.0466           | 60.19    | 0.4253 ± 0.0499             | 60.12    |
| 1                              | 0.2648 ± 0.0216      | 51.54    | 0.3757 ± 0.0186          | 62.06    | 0.2980 ± 0.0130          | 52.11    | 0.2980 ± 0.0130           | 61.62    | 0.4207 ± 0.0715             | 59.27    |
| 1.5                            | 0.2550 ± 0.0143      | 48.87    | 0.3253 ± 0.0554          | 50.89    | 0.3668 ± 0.0138          | 69.14    | 0.3278 ± 0.0166           | 62.24    | 0.4363 ± 0.0678             | 62.13    |
| 2                              | 0.3118 ± 0.0548      | 64.43    | 0.3097 ± 0.0786          | 47.41    | 0.3240 ± 0.0188          | 58.55    | 0.3055 ± 0.0221           | 56.54    | 0.3220 ± 0.0360             | 41.22    |
| 4                              | 0.2768 ± 0.0454      | 54.83    | 0.3140 ± 0.0674          | 48.37    | 0.3485 ± 0.0265          | 64.62    | 0.2985 ± 0.0336           | 54.74    | 0.4110 ± 0.0888             | 57.50    |
| 6                              | 0.2575 ± 0.0331      | 49.55    | 0.3020 ± 0.0928          | 45.71    | 0.3420 ± 0.0294          | 63.01    | 0.3218 ± 0.0212           | 60.71    | 0.3717 ± 0.0180             | 50.30    |
| 8                              | 0.2670 ± 0.0327      | 52.16    | 0.2797 ± 0.0343          | 40.75    | 0.3045 ± 0.0638          | 53.72    | 0.3045 ± 0.0638           | 56.28    | 0.3603 ± 0.0617             | 48.23    |
| 12                             | 0.2310 ± 0.0309      | 42.29    | 0.2813 ± 0.0023          | 41.12    | 0.2760 ± 0.0316          | 46.65    | 0.2973 ± 0.0402           | 54.42    | 0.2880 ± 0.0105             | 35.00    |

serum of different time points (  $\bar{x}\pm s,n=4$  ) .

Table 2

Effects of cell viability of Glu solution injury on PC12 cell preprotected 2 h by 5% NMT and its four single herbs drug-containing serum of different time points (  $\bar{x}\pm s,n=4$  ) .

| Dosing<br>time<br>point<br>(h) | Cell vitality of NMT |          | Cell vitality of rhubarb |          | Cell vitality of Ginseng |          | Cell vitality of Pueraria |          | Cell vitality of Chuanxiong |          |
|--------------------------------|----------------------|----------|--------------------------|----------|--------------------------|----------|---------------------------|----------|-----------------------------|----------|
|                                | OD <sub>490nm</sub>  | Cell     | OD <sub>490nm</sub>      | Cell     | OD <sub>490nm</sub>      | Cell     | OD <sub>490nm</sub>       | Cell     | OD <sub>490nm</sub>         | Cell     |
|                                |                      | survival |                          | survival |                          | survival |                           | survival |                             | survival |
|                                |                      | rate     |                          | rate     |                          | rate     |                           | rate     |                             | rate     |
|                                |                      | (%)      |                          | (%)      |                          | (%)      |                           | (%)      |                             | (%)      |
| 0                              | 0.4465 ± 0.0217      | 52.24    | 0.3773 ± 0.0240          | 61.38    | 0.3173 ± 0.0266          | 57.27    | 0.2118 ± 0.0162           | 35.98    | 0.2568 ± 0.0067             | 45.89    |
| 0.08                           | 0.4908 ± 0.0289      | 58.45    | 0.3643 ± 0.0775          | 58.57    | 0.2988 ± 0.0618          | 52.49    | 0.1458 ± 0.0109           | 17.25    | 0.3250 ± 0.1127             | 64.13    |
| 0.25                           | 0.5183 ± 0.0146      | 62.31    | 0.3630 ± 0.0255          | 58.29    | 0.3583 ± 0.0942          | 67.77    | 0.1418 ± 0.0156           | 16.11    | 0.2975 ± 0.0698             | 56.78    |
| 0.5                            | 0.4668 ± 0.0221      | 55.08    | 0.3693 ± 0.1270          | 59.65    | 0.3170 ± 0.0326          | 57.18    | 0.1893 ± 0.0182           | 29.60    | 0.3038 ± 0.0765             | 58.45    |

|      |                 |       |                 |       |                 |       |                 |       |                 |       |
|------|-----------------|-------|-----------------|-------|-----------------|-------|-----------------|-------|-----------------|-------|
| 0.75 | 0.4990 ± 0.0100 | 59.61 | 0.3870 ± 0.0240 | 63.47 | 0.3105 ± 0.0660 | 55.51 | 0.2338 ± 0.0709 | 42.23 | 0.3035 ± 0.0441 | 58.38 |
| 1    | 0.5383 ± 0.0109 | 65.11 | 0.4477 ± 0.0650 | 76.59 | 0.3203 ± 0.0891 | 58.01 | 0.1635 ± 0.0334 | 22.29 | 0.3343 ± 0.0214 | 66.60 |
| 1.5  | 0.5100 ± 0.0217 | 61.15 | 0.4220 ± 0.0296 | 71.04 | 0.3023 ± 0.0842 | 53.39 | 0.2000 ± 0.0360 | 32.65 | 0.3070 ± 0.0429 | 59.32 |
| 2    | 0.5273 ± 0.0340 | 63.57 | 0.3670 ± 0.0416 | 69.15 | 0.3267 ± 0.0297 | 59.66 | 0.2078 ± 0.0136 | 34.85 | 0.3228 ± 0.0577 | 58.53 |
| 4    | 0.5193 ± 0.0126 | 62.45 | 0.4007 ± 0.1277 | 66.43 | 0.2935 ± 0.0657 | 51.14 | 0.2698 ± 0.0573 | 52.45 | 0.2990 ± 0.0512 | 57.18 |
| 6    | 0.5063 ± 0.0118 | 60.62 | 0.3813 ± 0.0194 | 62.25 | 0.2020 ± 0.0576 | 27.65 | 0.2595 ± 0.0564 | 49.54 | 0.2510 ± 0.0640 | 44.36 |
| 8    | 0.5030 ± 0.0068 | 60.17 | 0.3277 ± 0.1029 | 50.65 | 0.1840 ± 0.0366 | 23.03 | 0.2610 ± 0.0485 | 49.96 | 0.2615 ± 0.0496 | 47.16 |
| 12   | 0.4530 ± 0.0377 | 53.16 | 0.3433 ± 0.0673 | 54.03 | 0.1815 ± 0.0493 | 22.38 | 0.2248 ± 0.0511 | 39.67 | 0.2230 ± 0.0631 | 36.87 |

Table 3

Effects of cell viability of H<sub>2</sub>O<sub>2</sub> solution injury on PC12 cell preprotected 12 h by 5% NMT and its four single herbs drug-containing serum of different time points (  $\bar{x}\pm s,n=4$  ) .

| Dosing<br>time<br>point<br>(h) | Cell vitality of NMT |          | Cell vitality of rhubarb |          | Cell vitality of Ginseng |          | Cell vitality of Pueraria |          | Cell vitality of Chuanxiong |          |
|--------------------------------|----------------------|----------|--------------------------|----------|--------------------------|----------|---------------------------|----------|-----------------------------|----------|
|                                | OD <sub>490nm</sub>  | Cell     | OD <sub>490nm</sub>      | Cell     | OD <sub>490nm</sub>      | Cell     | OD <sub>490nm</sub>       | Cell     | OD <sub>490nm</sub>         | Cell     |
|                                |                      | survival |                          | survival |                          | survival |                           | survival |                             | survival |
|                                |                      | rate     |                          | rate     |                          | rate     |                           | rate     |                             | rate     |
|                                |                      | (%)      |                          | (%)      |                          | (%)      |                           | (%)      |                             | (%)      |
| 0                              | 0.4927 ± 0.0333      | 47.28    | 0.8163 ± 0.1008          | 57.66    | 0.4250 ± 0.0187          | 67.80    | 0.1920 ± 0.0359           | 48.13    | 0.3220 ± 0.0097             | 41.69    |
| 0.08                           | 0.5097 ± 0.0549      | 49.37    | 0.9793 ± 0.1220          | 70.76    | 0.4517 ± 0.0095          | 73.25    | 0.1740 ± 0.0101           | 41.18    | 0.3028 ± 0.0481             | 38.30    |
| 0.25                           | 0.4963 ± 0.0249      | 47.73    | 0.9657 ± 0.0922          | 69.66    | 0.4930 ± 0.0167          | 81.69    | 0.2293 ± 0.0231           | 62.55    | 0.3443 ± 0.0203             | 45.60    |
| 0.5                            | 0.5003 ± 0.0227      | 48.22    | 0.8813 ± 0.2103          | 62.88    | 0.4533 ± 0.0725          | 73.59    | 0.2390 ± 0.0190           | 66.28    | 0.3865 ± 0.0229             | 53.03    |
| 0.75                           | 0.5440 ± 0.0344      | 53.58    | 1.0260 ± 0.0267          | 74.50    | 0.3780 ± 0.0168          | 72.20    | 0.2257 ± 0.0047           | 61.13    | 0.3440 ± 0.0144             | 45.56    |
| 1                              | 0.5123 ± 0.0076      | 49.69    | 0.9257 ± 0.0748          | 66.44    | 0.4413 ± 0.0216          | 71.14    | 0.2293 ± 0.0146           | 62.55    | 0.3608 ± 0.0581             | 48.50    |
| 1.5                            | 0.5510 ± 0.0610      | 54.44    | 0.9343 ± 0.0455          | 67.14    | 0.3720 ± 0.0504          | 56.98    | 0.2413 ± 0.0031           | 67.18    | 0.3428 ± 0.0190             | 45.34    |
| 2                              | 0.5817 ± 0.0265      | 58.21    | 0.8250 ± 0.1821          | 58.36    | 0.3610 ± 0.0035          | 54.73    | 0.2230 ± 0.0132           | 60.10    | 0.2878 ± 0.0456             | 45.06    |
| 4                              | 0.4900 ± 0.0731      | 46.95    | 0.6903 ± 0.0721          | 47.54    | 0.2897 ± 0.0735          | 40.16    | 0.1943 ± 0.0112           | 59.03    | 0.3393 ± 0.1006             | 44.72    |
| 6                              | 0.4550 ± 0.0427      | 42.65    | 0.6170 ± 0.0282          | 41.64    | 0.3927 ± 0.0416          | 61.20    | 0.2067 ± 0.0163           | 53.80    | 0.1968 ± 0.0583             | 19.66    |
| 8                              | 0.4940 ± 0.0739      | 47.44    | 0.6330 ± 0.0235          | 42.93    | 0.3045 ± 0.0120          | 43.19    | 0.2063 ± 0.0131           | 53.67    | 0.2115 ± 0.0273             | 22.25    |
| 12                             | 0.4813 ± 0.0306      | 45.89    | 0.5637 ± 0.0417          | 37.36    | 0.2060 ± 0.0166          | 23.08    | 0.1687 ± 0.0265           | 39.12    | 0.1545 ± 0.0075             | 12.23    |

Table 4

Effects of cell viability of KCl solution injury on PC12 cell preprotected 12 h by 5% 5% NMT and its four single herbs drug-containing

serum of different time points (  $\bar{x}\pm s,n=4$  ) .

**Table 5** LC-high resolution-MS/MS analysis of chemical compounds in Nao-Mai-Tong extract

| Peak No. | $t_{R(min)}$ | Compounds                     | Molecular formula                               | Precursor ions(Error:ppm)          | Source |
|----------|--------------|-------------------------------|-------------------------------------------------|------------------------------------|--------|
| 1        | 3.22         | 3'-MethoxyPuerarin-6"-O-Glc   | C <sub>28</sub> H <sub>32</sub> O <sub>15</sub> | 609.1799(-2.41)[M+H] <sup>+</sup>  | g      |
| 2        | 5.00         | 3'-Hydroxy puerarin 4'-O-Glc  | C <sub>27</sub> H <sub>30</sub> O <sub>15</sub> | 593.1504 (0.40)[M-H] <sup>-</sup>  | g      |
| 3        | 5.52         | Puerarin-Glc                  | C <sub>27</sub> H <sub>30</sub> O <sub>14</sub> | 579.1695 (-3.25)[M+H] <sup>+</sup> | g      |
| 4        | 6.39         | 3'-MethoxyPuerarin-4'-O-Glc   | C <sub>28</sub> H <sub>32</sub> O <sub>15</sub> | 607.1663(0.04)[M-H] <sup>-</sup>   | g      |
| 5        | 7.53         | Daidzin-4'-O-Glc              | C <sub>27</sub> H <sub>30</sub> O <sub>14</sub> | 579.1695 (-3.25)[M+H] <sup>+</sup> | g      |
| 6        | 9.40         | 3'-Hydroxypuerarin*           | C <sub>21</sub> H <sub>20</sub> O <sub>10</sub> | 431.0971 (-1.67)[M-H] <sup>-</sup> | g      |
| 7        | 10.38        | 3'-Hydroxypuerarin-Xyl/isomer | C <sub>26</sub> H <sub>28</sub> O <sub>14</sub> | 565.1538 (-3.42)[M+H] <sup>+</sup> | g      |
| 8        | 10.54        | Catechin                      | C <sub>15</sub> H <sub>14</sub> O <sub>6</sub>  | 289.0714 (2.54)[M-H] <sup>-</sup>  | d      |
| 9        | 11.69        | 3'-Hydroxypuerarin-Xyl/isomer | C <sub>26</sub> H <sub>28</sub> O <sub>14</sub> | 565.1538 (-3.42)[M+H] <sup>+</sup> | g      |
| 10       | 14.70        | Puerarin*                     | C <sub>21</sub> H <sub>20</sub> O <sub>9</sub>  | 415.1026 (-0.74)[M-H] <sup>-</sup> | g      |
| 11       | 15.47        | Puerarin-Xyl                  | C <sub>26</sub> H <sub>28</sub> O <sub>13</sub> | 549.1591 (-3.12)[M+H] <sup>+</sup> | g      |
| 12       | 16.50        | 3'-Methoxypuerarin*           | C <sub>22</sub> H <sub>22</sub> O <sub>10</sub> | 445.1131 (-0.84)[M-H] <sup>-</sup> | g      |
| 13       | 16.99        | Puerarin-Api                  | C <sub>26</sub> H <sub>28</sub> O <sub>13</sub> | 549.1591 (-3.12)[M+H] <sup>+</sup> | g      |
| 14       | 18.63        | 3'-Methoxypuerarin-Api        | C <sub>27</sub> H <sub>30</sub> O <sub>14</sub> | 579.1695 (-3.25)[M+H] <sup>+</sup> | g      |
| 15       | 20.97        | Daidzin*                      | C <sub>21</sub> H <sub>20</sub> O <sub>9</sub>  | 417.1170 (-3.72)[M+H] <sup>+</sup> | g      |
| 16       | 22.63        | Genistein-8-C-Glc-Api /isomer | C <sub>26</sub> H <sub>28</sub> O <sub>14</sub> | 565.1538 (-3.42)[M+H] <sup>+</sup> | g      |
| 17       | 23.36        | 3'-Methoxydaidzin             | C <sub>22</sub> H <sub>22</sub> O <sub>10</sub> | 447.1275 (-3.63)[M+H] <sup>+</sup> | g      |
| 18       | 24.08        | Genistin-8-C-Glc              | C <sub>21</sub> H <sub>20</sub> O <sub>10</sub> | 431.0970 (-0.63)[M-H] <sup>-</sup> | g      |

| Dosing<br>time<br>point<br>(h) | Cell vitality of NMT |         | Cell vitality of rhubarb |          | Cell vitality of Ginseng |          | Cell vitality of Pueraria |          | Cell vitality of Chuanxiong |          |
|--------------------------------|----------------------|---------|--------------------------|----------|--------------------------|----------|---------------------------|----------|-----------------------------|----------|
|                                | OD <sub>490nm</sub>  | Cell    | OD <sub>490nm</sub>      | Cell     | OD <sub>490nm</sub>      | Cell     | OD <sub>490nm</sub>       | Cell     | OD <sub>490nm</sub>         | Cell     |
|                                |                      | surviv  |                          | survival |                          | survival |                           | survival |                             | survival |
|                                |                      | al rate |                          | rate     |                          | rate     |                           | rate     |                             | rate     |
|                                |                      | (%)     |                          | (%)      |                          | (%)      |                           | (%)      |                             | (%)      |
| 0                              | 0.2842 ± 0.0141      | 48.44   | 0.5177 ± 0.0612          | 56.39    | 0.3310 ± 0.0445          | 47.11    | 0.1770 ± 0.0137           | 38.65    | 0.3710 ± 0.0490             | 56.56    |
| 0.08                           | 0.2893 ± 0.0044      | 49.68   | 0.5173 ± 0.0722          | 56.34    | 0.3127 ± 0.0256          | 43.49    | 0.1400 ± 0.0132           | 25.82    | 0.3710 ± 0.0078             | 56.56    |
| 0.25                           | 0.2980 ± 0.0153      | 51.76   | 0.5213 ± 0.0574          | 56.88    | 0.3527 ± 0.0241          | 43.38    | 0.1553 ± 0.0071           | 31.14    | 0.4037 ± 0.0817             | 63.15    |
| 0.5                            | 0.3088 ± 0.0115      | 54.36   | 0.4050 ± 0.0322          | 61.39    | 0.3123 ± 0.0175          | 43.42    | 0.1533 ± 0.0150           | 30.44    | 0.4117 ± 0.0165             | 64.76    |
| 0.75                           | 0.3092 ± 0.0236      | 54.44   | 0.6167 ± 0.1104          | 69.57    | 0.3440 ± 0.0368          | 49.67    | 0.1763 ± 0.0129           | 38.42    | 0.4327 ± 0.0450             | 69.00    |
| 1                              | 0.4022 ± 0.0064      | 76.76   | 0.5723 ± 0.0844          | 63.66    | 0.3787 ± 0.0633          | 56.51    | 0.1550 ± 0.0036           | 31.02    | 0.4467 ± 0.0260             | 71.82    |
| 1.5                            | 0.3742 ± 0.0216      | 70.04   | 0.5610 ± 0.1216          | 62.16    | 0.3370 ± 0.0250          | 48.29    | 0.2167 ± 0.0072           | 52.40    | 0.4627 ± 0.0115             | 75.05    |
| 2                              | 0.3487 ± 0.0175      | 63.92   | 0.4663 ± 0.0560          | 49.56    | 0.2993 ± 0.0315          | 40.86    | 0.2237 ± 0.0171           | 54.82    | 0.4157 ± 0.0124             | 65.57    |
| 4                              | 0.3303 ± 0.0054      | 59.52   | 0.5093 ± 0.0486          | 55.28    | 0.3077 ± 0.0103          | 42.50    | 0.1857 ± 0.0040           | 41.65    | 0.4087 ± 0.0163             | 64.16    |
| 6                              | 0.3557 ± 0.0163      | 65.60   | 0.3990 ± 0.1066          | 40.59    | 0.3117 ± 0.0475          | 43.29    | 0.2040 ± 0.0056           | 48.01    | 0.3723 ± 0.0212             | 56.83    |
| 8                              | 0.3722 ± 0.0228      | 69.56   | 0.3837 ± 0.0499          | 38.55    | 0.2943 ± 0.0119          | 39.87    | 0.2037 ± 0.0148           | 47.89    | 0.3713 ± 0.0319             | 56.62    |
| 12                             | 0.3253 ± 0.0162      | 58.32   | 0.4337 ± 0.0180          | 45.21    | 0.2897 ± 0.0211          | 38.95    | 0.1753 ± 0.0170           | 38.07    | 0.3353 ± 0.0612             | 49.36    |

|    |       |                                  |                                                 |                                         |   |
|----|-------|----------------------------------|-------------------------------------------------|-----------------------------------------|---|
| 19 | 24.61 | Genistein-8-C-Glc-API /isomer    | C <sub>26</sub> H <sub>28</sub> O <sub>14</sub> | 565.1538 (-3.42)[M+H] <sup>+</sup>      | g |
| 20 | 25.44 | Ferulic Acid*                    | C <sub>10</sub> H <sub>10</sub> O <sub>4</sub>  | 195.0648 (-4.79)[M+H] <sup>+</sup>      | c |
| 21 | 26.18 | Aloe-emodin-8-O-Glc*             | C <sub>21</sub> H <sub>20</sub> O <sub>10</sub> | 431.0974 (-0.98)[M-H] <sup>-</sup>      | d |
| 22 | 26.25 | Pueroside A                      | C <sub>29</sub> H <sub>34</sub> O <sub>14</sub> | 605.1866 (0.12)[M-H] <sup>-</sup>       | g |
| 23 | 26.94 | Rhein-8-O-Glc*                   | C <sub>21</sub> H <sub>18</sub> O <sub>11</sub> | 445.0768 (0.59)[M-H] <sup>-</sup>       | d |
| 24 | 26.97 | Sennoside B                      | C <sub>42</sub> H <sub>38</sub> O <sub>20</sub> | 861.1865 (-1.21)[M-H] <sup>-</sup>      | d |
| 25 | 28.95 | Pueroside D/B                    | C <sub>30</sub> H <sub>36</sub> O <sub>15</sub> | 681.2022 (-0.48)[M-H] <sup>-</sup>      | g |
| 26 | 29.38 | Pueroside D/B                    | C <sub>24</sub> H <sub>26</sub> O <sub>10</sub> | 681.2022 (-0.48)[M-H] <sup>-</sup>      | g |
| 27 | 29.60 | Formononetin 8-C-Glc -Xyl        | C <sub>27</sub> H <sub>30</sub> O <sub>13</sub> | 563.1746(-2.30)[M+H] <sup>+</sup>       | g |
| 28 | 29.79 | Sennoside C                      | C <sub>42</sub> H <sub>40</sub> O <sub>19</sub> | 847.2070 (-1.01)[M-H] <sup>-</sup>      | d |
| 29 | 29.94 | Malonyl-daidzin                  | C <sub>24</sub> H <sub>22</sub> O <sub>12</sub> | 503.1172 (-1.20)[M+H] <sup>+</sup>      | g |
| 30 | 30.25 | Formononetin 8-C-Glc -Api        | C <sub>27</sub> H <sub>30</sub> O <sub>13</sub> | 563.1744 (-2.73)[M+H] <sup>+</sup>      | g |
| 31 | 30.43 | 4'-Methoxypuerarin               | C <sub>22</sub> H <sub>22</sub> O <sub>9</sub>  | 429.1177 (-1.97)[M-H] <sup>-</sup>      | g |
| 32 | 30.50 | Sennoside A                      | C <sub>42</sub> H <sub>38</sub> O <sub>20</sub> | 861.1865 (1.21)[M-H] <sup>-</sup>       | d |
| 33 | 32.26 | Unknown G                        | C <sub>50</sub> H <sub>92</sub> O <sub>31</sub> | 616.2745 (-3.42)[M+CO2] <sup>2-</sup>   | r |
| 34 | 33.56 | Dihydroxyginsenoside Rb1/isomer  | C <sub>54</sub> H <sub>94</sub> O <sub>25</sub> | 616.3014 (-1.66)[M+2HCOO] <sup>2-</sup> | r |
| 35 | 33.66 | N R1/isomer                      | C <sub>47</sub> H <sub>80</sub> O <sub>18</sub> | 977.5304 (-1.76)[M+HCOO] <sup>-</sup>   | r |
| 36 | 33.69 | 20-Glc-G Rf                      | C <sub>48</sub> H <sub>82</sub> O <sub>19</sub> | 1007.5411 (-1.57)[M+HCOO] <sup>-</sup>  | r |
| 37 | 33.84 | Chikusetsusaponin FM1/isomer     | C <sub>53</sub> H <sub>92</sub> O <sub>24</sub> | 601.2964 (-1.22)[M+2HCOO] <sup>2-</sup> | r |
| 38 | 34.24 | N R1/isomer                      | C <sub>47</sub> H <sub>80</sub> O <sub>18</sub> | 977.5304 (-1.76)[M+HCOO] <sup>-</sup>   | r |
| 39 | 34.39 | Senkyunolide F/isomer            | C <sub>12</sub> H <sub>14</sub> O <sub>3</sub>  | 207.1010 (-2.56)[M+H] <sup>+</sup>      | c |
| 40 | 34.41 | Chikusetsusaponin FM1/isomer     | C <sub>53</sub> H <sub>92</sub> O <sub>24</sub> | 601.2960(-1.84)[M+2HCOO] <sup>2-</sup>  | r |
| 41 | 34.42 | Senkyunolide I*                  | C <sub>12</sub> H <sub>16</sub> O <sub>4</sub>  | 247.0933 (-3.16)[M+Na] <sup>+</sup>     | c |
| 42 | 34.48 | Sophoraside A                    | C <sub>24</sub> H <sub>26</sub> O <sub>10</sub> | 473.1438(-3.09)[M-H] <sup>-</sup>       | g |
| 43 | 34.61 | Dihydroxyginsenoside Rb1 /isomer | C <sub>54</sub> H <sub>94</sub> O <sub>25</sub> | 616.3014 (-1.56)[M+2HCOO] <sup>2-</sup> | r |
| 44 | 35.12 | Chikusetsusaponin FM1/isomer     | C <sub>53</sub> H <sub>92</sub> O <sub>24</sub> | 601.2963 (-1.44)[M+2HCOO] <sup>2-</sup> | r |
| 45 | 35.48 | G Rg1*                           | C <sub>42</sub> H <sub>72</sub> O <sub>14</sub> | 845.4881 (-2.08)[M+HCOO] <sup>-</sup>   | r |
| 46 | 35.55 | G Re*                            | C <sub>48</sub> H <sub>82</sub> O <sub>18</sub> | 991.5451 (-2.69)[M+HCOO] <sup>-</sup>   | r |
| 47 | 35.63 | Chikusetsusaponin FM1/isomer     | C <sub>53</sub> H <sub>92</sub> O <sub>24</sub> | 601.2960(-1.84)[M+2HCOO] <sup>2-</sup>  | r |
| 48 | 35.73 | Isoswertisin 2"-O-Xyl            | C <sub>27</sub> H <sub>30</sub> O <sub>14</sub> | 579.1694 (-1.34)[M+H] <sup>+</sup>      | g |
| 49 | 35.87 | Ononin                           | C <sub>22</sub> H <sub>22</sub> O <sub>9</sub>  | 431.1325 (-2.69)[M+H] <sup>+</sup>      | g |
| 50 | 36.04 | Senkyunolide F/isomer            | C <sub>12</sub> H <sub>14</sub> O <sub>3</sub>  | 207.1011 (-2.47)[M+H] <sup>+</sup>      | c |
| 51 | 36.50 | Daidzein*                        | C <sub>15</sub> H <sub>10</sub> O <sub>4</sub>  | 255.0645 (-4.84)[M+H] <sup>+</sup>      | g |
| 52 | 36.88 | Mal-G Rg1/isomer                 | C <sub>45</sub> H <sub>74</sub> O <sub>17</sub> | 885.4836 (-1.33)[M-H] <sup>-</sup>      | r |

|    |       |                                 |                                                  |                                         |   |
|----|-------|---------------------------------|--------------------------------------------------|-----------------------------------------|---|
| 53 | 36.90 | Unknown G                       | C <sub>54</sub> H <sub>92</sub> O <sub>24</sub>  | 607.2968 (-0.62)[M+2HCOO] <sup>2-</sup> | r |
| 54 | 37.52 | 3'-Methoxydaidzein              | C <sub>16</sub> H <sub>12</sub> O <sub>5</sub>   | 285.0748 (-3.33)[M+H] <sup>+</sup>      | g |
| 55 | 37.72 | Unknown G                       | C <sub>54</sub> H <sub>92</sub> O <sub>24</sub>  | 607.2962 (-1.53)[M+2HCOO] <sup>2-</sup> | r |
| 56 | 37.99 | Mal-G Re                        | C <sub>51</sub> H <sub>84</sub> O <sub>21</sub>  | 1031.5411 (-2.02)[M-H] <sup>-</sup>     | r |
| 57 | 38.16 | Mal-G Rg1/isomer                | C <sub>45</sub> H <sub>74</sub> O <sub>17</sub>  | 885.4836 (-1.33)[M-H] <sup>-</sup>      | r |
| 58 | 39.56 | Genkwanin 5-O-primeveroside     | C <sub>27</sub> H <sub>30</sub> O <sub>14</sub>  | 579.1691 (-3.04)[M+H] <sup>+</sup>      | g |
| 59 | 39.79 | Formononetin                    | C <sub>16</sub> H <sub>12</sub> O <sub>4</sub>   | 267.0655 (-0.88)[M-H] <sup>-</sup>      | d |
| 60 | 39.86 | Unknown triterpenoid saponins   | C <sub>48</sub> H <sub>76</sub> O <sub>21</sub>  | 987.4809 (0.21)[M-H] <sup>-</sup>       | — |
| 61 | 40.03 | Emodin-8-O-Glc*                 | C <sub>21</sub> H <sub>20</sub> O <sub>10</sub>  | 431.0970 (-1.91)[M-H] <sup>-</sup>      | d |
| 62 | 40.78 | Chrysophanol-8-O-Glc*           | C <sub>21</sub> H <sub>20</sub> O <sub>9</sub>   | 415.1024 (-1.22)[M-H] <sup>-</sup>      | d |
| 63 | 40.96 | N R6/R3                         | C <sub>48</sub> H <sub>82</sub> O <sub>19</sub>  | 1007.5411 (-1.57)[M+HCOO] <sup>-</sup>  | r |
| 64 | 42.17 | G R <sub>OA</sub>               | C <sub>54</sub> H <sub>86</sub> O <sub>24</sub>  | 581.2699 (-1.64)[M-CO2] <sup>2-</sup>   | r |
| 65 | 42.62 | Emodin 8-O-(6'-O-Mal)Glc/isomer | C <sub>24</sub> H <sub>22</sub> O <sub>13</sub>  | 517.0974 (-1.58)[M-H] <sup>-</sup>      | d |
| 66 | 42.76 | G Ra3/isomer                    | C <sub>59</sub> H <sub>100</sub> O <sub>27</sub> | 1285.6388(-3.59)[M+HCOO] <sup>-</sup>   | r |
| 67 | 43.66 | G Ra0/ Quinquenoside V          | C <sub>60</sub> H <sub>102</sub> O <sub>28</sub> | 680.3248(-1.84)[M+2HCOO] <sup>2-</sup>  | r |
| 68 | 43.70 | Emodin 8-O-(6'-O-Mal)Glc/isomer | C <sub>24</sub> H <sub>22</sub> O <sub>13</sub>  | 517.0974 (-1.58)[M-H] <sup>-</sup>      | d |
| 69 | 44.28 | G Rf*                           | C <sub>42</sub> H <sub>72</sub> O <sub>14</sub>  | 845.4882 (-1.96)[M+HCOO] <sup>-</sup>   | r |
| 70 | 44.55 | 5,6-Didehydroginsenoside Rb1    | C <sub>54</sub> H <sub>90</sub> O <sub>23</sub>  | 598.2925(-1.28)[M+2HCOO] <sup>2-</sup>  | r |
| 71 | 44.94 | Physcion-8-O-Glc *              | C <sub>22</sub> H <sub>22</sub> O <sub>10</sub>  | 445.1137 (0.78)[M-H] <sup>-</sup>       | d |
| 72 | 45.11 | G Ra2                           | C <sub>58</sub> H <sub>98</sub> O <sub>26</sub>  | 1255.6287 (-2.86)[M+HCOO] <sup>-</sup>  | r |
| 73 | 45.56 | G Ra3/isomer                    | C <sub>59</sub> H <sub>100</sub> O <sub>27</sub> | 1285.6399(-2.73)[M+HCOO] <sup>-</sup>   | r |
| 74 | 45.65 | G Rb1 *                         | C <sub>54</sub> H <sub>92</sub> O <sub>23</sub>  | 1107.5920 (-2.81)[M-H] <sup>-</sup>     | r |
| 75 | 45.65 | GF5/F3/N R2                     | C <sub>41</sub> H <sub>70</sub> O <sub>13</sub>  | 815.4777 (-1.28)[M+HCOO] <sup>-</sup>   | r |
| 76 | 46.37 | Mal-G Rb1                       | C <sub>57</sub> H <sub>94</sub> O <sub>26</sub>  | 1193.5929 (-2.18)[M-H] <sup>-</sup>     | r |
| 77 | 46.85 | G Rc*                           | C <sub>53</sub> H <sub>90</sub> O <sub>22</sub>  | 1123.5870 (-2.70)[M+HCOO] <sup>-</sup>  | r |
| 78 | 46.95 | G Ra1                           | C <sub>58</sub> H <sub>98</sub> O <sub>26</sub>  | 1255.6292 (-2.50)[M+HCOO] <sup>-</sup>  | r |
| 79 | 47.18 | G Rg2*                          | C <sub>42</sub> H <sub>72</sub> O <sub>13</sub>  | 829.4940 (-0.48)[M+HCOO] <sup>-</sup>   | r |
| 80 | 47.39 | G Rh1                           | C <sub>36</sub> H <sub>62</sub> O <sub>9</sub>   | 683.4358 (-1.81)[M+HCOO] <sup>-</sup>   | r |
| 81 | 47.66 | Mal-G Rc                        | C <sub>56</sub> H <sub>92</sub> O <sub>25</sub>  | 1163.5825 (-2.08)[M-H] <sup>-</sup>     | r |
| 82 | 48.07 | G Ro                            | C <sub>48</sub> H <sub>76</sub> O <sub>19</sub>  | 955.4881 (-2.26)[M-H] <sup>-</sup>      | r |
| 83 | 48.34 | G Rb2*                          | C <sub>53</sub> H <sub>90</sub> O <sub>22</sub>  | 1123.5869 (-2.78)[M+HCOO] <sup>-</sup>  | r |
| 84 | 49.01 | Mal-G Rb2                       | C <sub>56</sub> H <sub>92</sub> O <sub>25</sub>  | 1163.5823 (-2.27)[M-H] <sup>-</sup>     | r |

|     |       |                                     |                                                 |                                        |   |
|-----|-------|-------------------------------------|-------------------------------------------------|----------------------------------------|---|
| 85  | 49.29 | Methyl-Rhein                        | C <sub>16</sub> H <sub>10</sub> O <sub>6</sub>  | 297.0394(-3.37)[M-H] <sup>-</sup>      | d |
| 86  | 49.70 | Ac-G Rb1                            | C <sub>56</sub> H <sub>94</sub> O <sub>24</sub> | 1195.6090 (-1.80)[M+HCOO] <sup>-</sup> | r |
| 87  | 50.67 | G F1                                | C <sub>36</sub> H <sub>62</sub> O <sub>9</sub>  | 683.4363 (-1.08)[M+HCOO] <sup>-</sup>  | r |
| 88  | 50.88 | Mal-G Rb3/isomer                    | C <sub>56</sub> H <sub>92</sub> O <sub>25</sub> | 1163.5824 (-2.18)[M-H] <sup>-</sup>    | r |
| 89  | 51.15 | G Rs1                               | C <sub>55</sub> H <sub>92</sub> O <sub>23</sub> | 1165.5979 (-2.31)[M+HCOO] <sup>-</sup> | r |
| 90  | 51.39 | G Rd*                               | C <sub>48</sub> H <sub>82</sub> O <sub>18</sub> | 991.5455 (-2.29)[M+HCOO] <sup>-</sup>  | r |
| 91  | 51.66 | 28-Deglucosylchikusetsusaponin V    | C <sub>42</sub> H <sub>66</sub> O <sub>14</sub> | 793.4360(-1.4)[M-H] <sup>-</sup>       | r |
| 92  | 52.16 | 3-Butyl-4-hydroxyphthalide          | C <sub>12</sub> H <sub>14</sub> O <sub>3</sub>  | 207.1010(-2.71)[M+H] <sup>+</sup>      | c |
| 93  | 52.24 | Mal-G Rd/isomer                     | C <sub>51</sub> H <sub>84</sub> O <sub>21</sub> | 1031.5408 (-1.83)[M-H] <sup>-</sup>    | r |
| 94  | 52.59 | G Rs2                               | C <sub>55</sub> H <sub>92</sub> O <sub>23</sub> | 1165.5979 (-2.40)[M+HCOO] <sup>-</sup> | r |
| 95  | 52.59 | Aloe-emodin*                        | C <sub>15</sub> H <sub>10</sub> O <sub>5</sub>  | 269.0447 (-0.30)[M-H] <sup>-</sup>     | d |
| 96  | 54.35 | Mal-G Rd/isomer                     | C <sub>51</sub> H <sub>84</sub> O <sub>21</sub> | 1031.5408 (-1.83)[M-H] <sup>-</sup>    | r |
| 97  | 55.41 | Rhein*                              | C <sub>15</sub> H <sub>8</sub> O <sub>6</sub>   | 283.0239 (-1.28)[M-H] <sup>-</sup>     | d |
| 98  | 56.60 | N Fe                                | C <sub>47</sub> H <sub>80</sub> O <sub>17</sub> | 961.5353 (-1.41)[M+HCOO] <sup>-</sup>  | r |
| 99  | 60.90 | Senkyunolide A*                     | C <sub>12</sub> H <sub>16</sub> O <sub>2</sub>  | 193.1219 (-5.98)[M+H] <sup>+</sup>     | c |
| 100 | 61.68 | G F2/isomer                         | C <sub>42</sub> H <sub>72</sub> O <sub>13</sub> | 829.4950 (-0.60) [M+HCOO] <sup>-</sup> | r |
| 101 | 62.78 | 3-Butylphthalide*                   | C <sub>12</sub> H <sub>14</sub> O <sub>2</sub>  | 191.1062 (-5.26)[M+H] <sup>+</sup>     | c |
| 102 | 64.30 | Chikusetsusaponin Iva/isomer        | C <sub>42</sub> H <sub>66</sub> O <sub>14</sub> | 793.4362(-2.14)[M-H] <sup>-</sup>      | r |
| 103 | 66.86 | Cindilide                           | C <sub>12</sub> H <sub>18</sub> O <sub>2</sub>  | 195.1378 (-3.61)[M+H] <sup>+</sup>     | c |
| 104 | 67.08 | G Rg3*                              | C <sub>42</sub> H <sub>72</sub> O <sub>13</sub> | 829.4938 (-0.72)[M+HCOO] <sup>-</sup>  | r |
| 105 | 67.12 | Unknown triterpenoid                | C <sub>42</sub> H <sub>66</sub> O <sub>14</sub> | 793.4364(-1.99)[M-H] <sup>-</sup>      | c |
| 106 | 67.76 | Butyldenephthalide/isomer           | C <sub>12</sub> H <sub>12</sub> O <sub>2</sub>  | 189.0908 (-3.99)[M+H] <sup>+</sup>     | c |
| 107 | 68.83 | Neocindilide                        | C <sub>12</sub> H <sub>18</sub> O <sub>2</sub>  | 195.1377 (-4.12)[M+H] <sup>+</sup>     | c |
| 108 | 69.06 | Emodin*                             | C <sub>15</sub> H <sub>10</sub> O <sub>5</sub>  | 269.0448 (-0.20)[M-H] <sup>-</sup>     | d |
| 109 | 69.31 | Ligustilide*                        | C <sub>12</sub> H <sub>14</sub> O <sub>2</sub>  | 191.1062 (-5.26)[M+H] <sup>+</sup>     | c |
| 110 | 70.46 | Butyldenephthalide/isomer           | C <sub>12</sub> H <sub>12</sub> O <sub>2</sub>  | 189.0908 (-3.99)[M+H] <sup>+</sup>     | c |
| 111 | 72.42 | 28-Desglucosylchikusetsusaponin IVa | C <sub>36</sub> H <sub>56</sub> O <sub>9</sub>  | 631.3838(-2.16)[M-H] <sup>-</sup>      | r |
| 112 | 80.82 | Chrysophanol                        | C <sub>15</sub> H <sub>10</sub> O <sub>4</sub>  | 253.0497 (-1.52)[M-H] <sup>-</sup>     | d |
| 113 | 81.06 | G Rg31/ Rg5/ Rk1/Rz1                | C <sub>42</sub> H <sub>70</sub> O <sub>12</sub> | 811.4858[M+HCOO] <sup>-</sup>          | r |
| 114 | 82.28 | Angelicide                          | C <sub>24</sub> H <sub>28</sub> O <sub>4</sub>  | 381.2052 (-3.63)[M+H] <sup>+</sup>     | c |
| 115 | 83.16 | Senkyunolide P/isomer               | C <sub>24</sub> H <sub>30</sub> O <sub>4</sub>  | 383.2207 (-4.00)[M+H] <sup>+</sup>     | c |
| 116 | 87.10 | Senkyunolide P/isomer               | C <sub>24</sub> H <sub>30</sub> O <sub>4</sub>  | 383.2207 (-4.00)[M+H] <sup>+</sup>     | c |
| 117 | 87.62 | Physcion                            | C <sub>16</sub> H <sub>12</sub> O <sub>5</sub>  | 283.0606 (-0.14)[M-H] <sup>-</sup>     | d |
| 118 | 87.74 | Riligustilide                       | C <sub>24</sub> H <sub>28</sub> O <sub>4</sub>  | 381.2052 (-3.63)[M+H] <sup>+</sup>     | c |
| 119 | 88.87 | Tokinolide B                        | C <sub>24</sub> H <sub>28</sub> O <sub>4</sub>  | 381.2053 (-3.37)[M+H] <sup>+</sup>     | c |
| 120 | 90.81 | Levistolide A                       | C <sub>24</sub> H <sub>28</sub> O <sub>4</sub>  | 381.2055 (-2.84)[M+H] <sup>+</sup>     | c |

**Fig. 1.** The protective of efficacy-time curve of 5% Naomaitong and single herbs drug-containing serum of different time points on Na<sub>2</sub>S<sub>2</sub>O<sub>4</sub> damage (  $\bar{x}\pm s,n=4$ ) .

**Fig. 2.** The protective efficacy-time curve of 5% Naomaitong and single herbs drug-containing serum of different time points on Glu damage (  $\bar{x} \pm s, n=4$  ) .

**Fig. 3.** The protective efficacy-time curve of 5% Naomaitong and single herbs drug-containing serum of different time points on KCl damage (  $\bar{x} \pm s, n=4$  ) .

**Fig. 4.** The protective efficacy-time curve of 5% Naomaitong and single herbs drug-containing serum of different time points on H<sub>2</sub>O<sub>2</sub> damage (  $\bar{x} \pm s, n=4$  ) .
